# Supplementary material
Source: PubMed Central journal article supplement (PMC11673509)
Supplement: NIHMS1941916-supplement-2.pdf [file NIHMS1941916-supplement-2.pdf]

## Supplementary figure 2

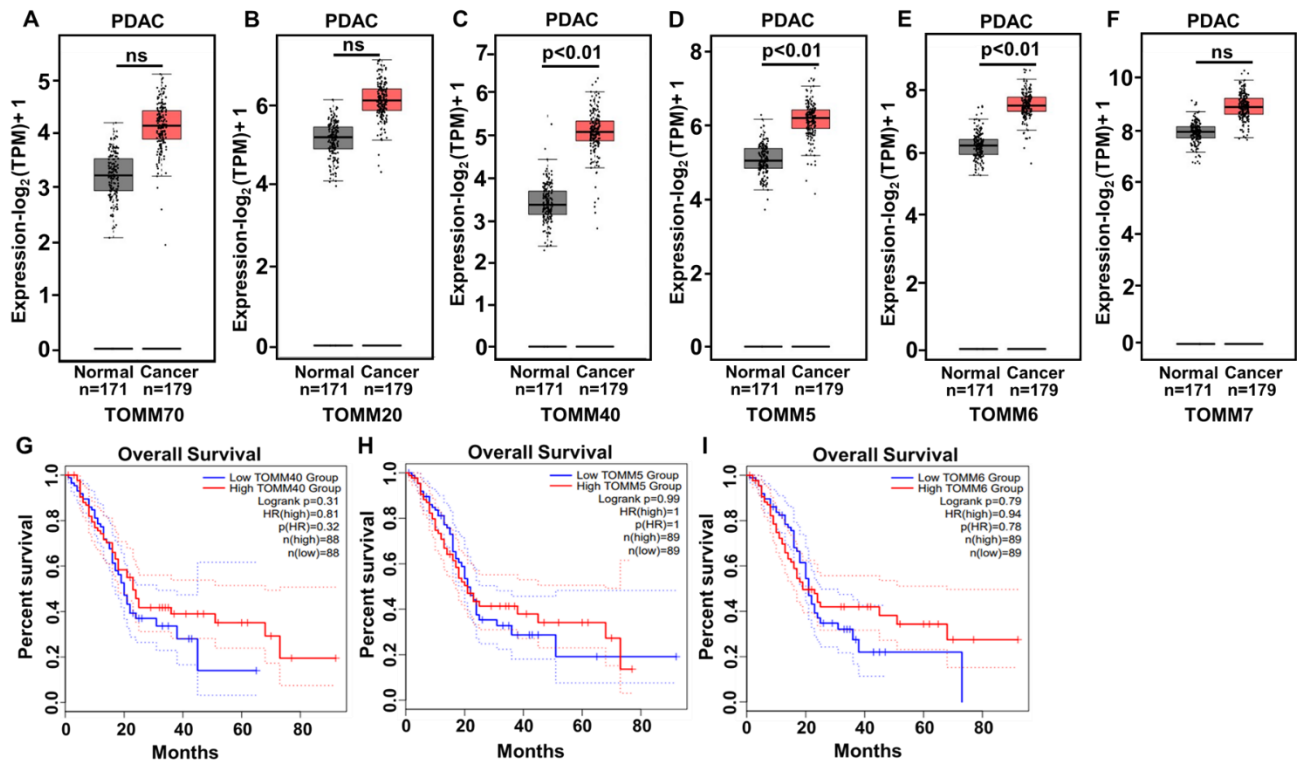

### Supplementary figure 2. mRNA expression of various TOMM subunits in pancreatic cancer and their association with patients' survival.

mRNA expression level of TOMM70 (A), TOMM20 (B), TOMM40 (C), TOMM5 (D), TOMM6 (E) and TOMM7 (F) in pancreatic cancer samples and the association of TOMM40 (G), TOMM5 (H) and TOMM6 (I) mRNA expression with patient survival was screened using datasets from GTex and TCGA.
