# Supplementary material
Source: PubMed Central journal article supplement (PMC11673509)
Supplement: NIHMS1941916-supplement-4.pdf [file NIHMS1941916-supplement-4.pdf]

Supplementary figure 4

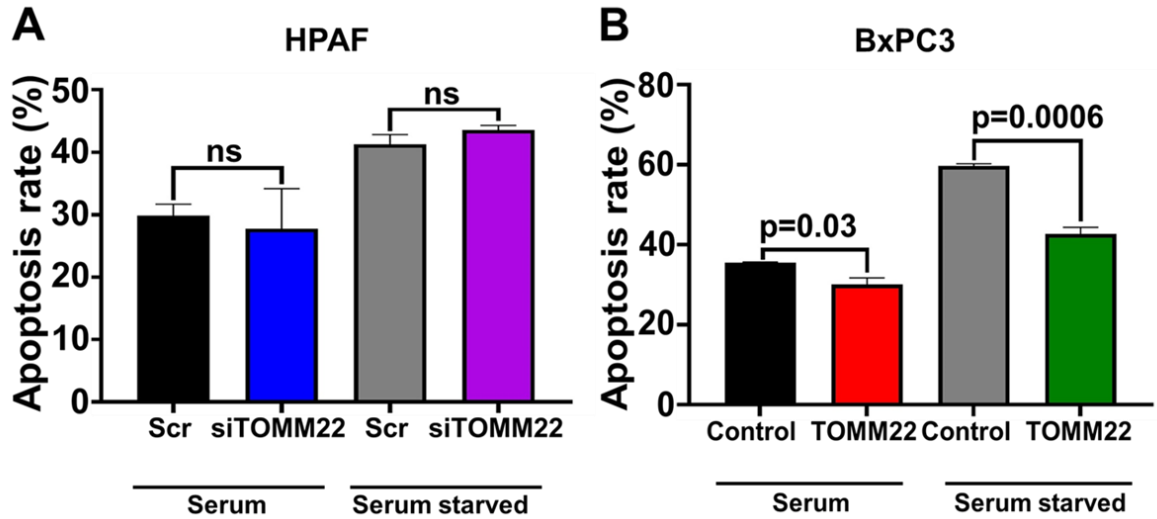

Supplementary figure 4. The impact of TOMM22 overexpression on apoptosis is context dependent.

The apoptosis rate of TOMM22 silenced cells (**A**), TOMM22 overexpressing cells (**B**) and their respective control cells under serum-containing and serum-starved conditions. The apoptotic rate (%) was calculated by subtracting the percentage of live cells from 100%. Data represent mean  $\pm$  SEM. Statistical analysis by unpaired Student's t-test.
