# Supplementary material
Source: PubMed Central journal article supplement (PMC11673509)
Supplement: NIHMS1941916-supplement-5.pdf [file NIHMS1941916-supplement-5.pdf]

## Supplementary figure 5

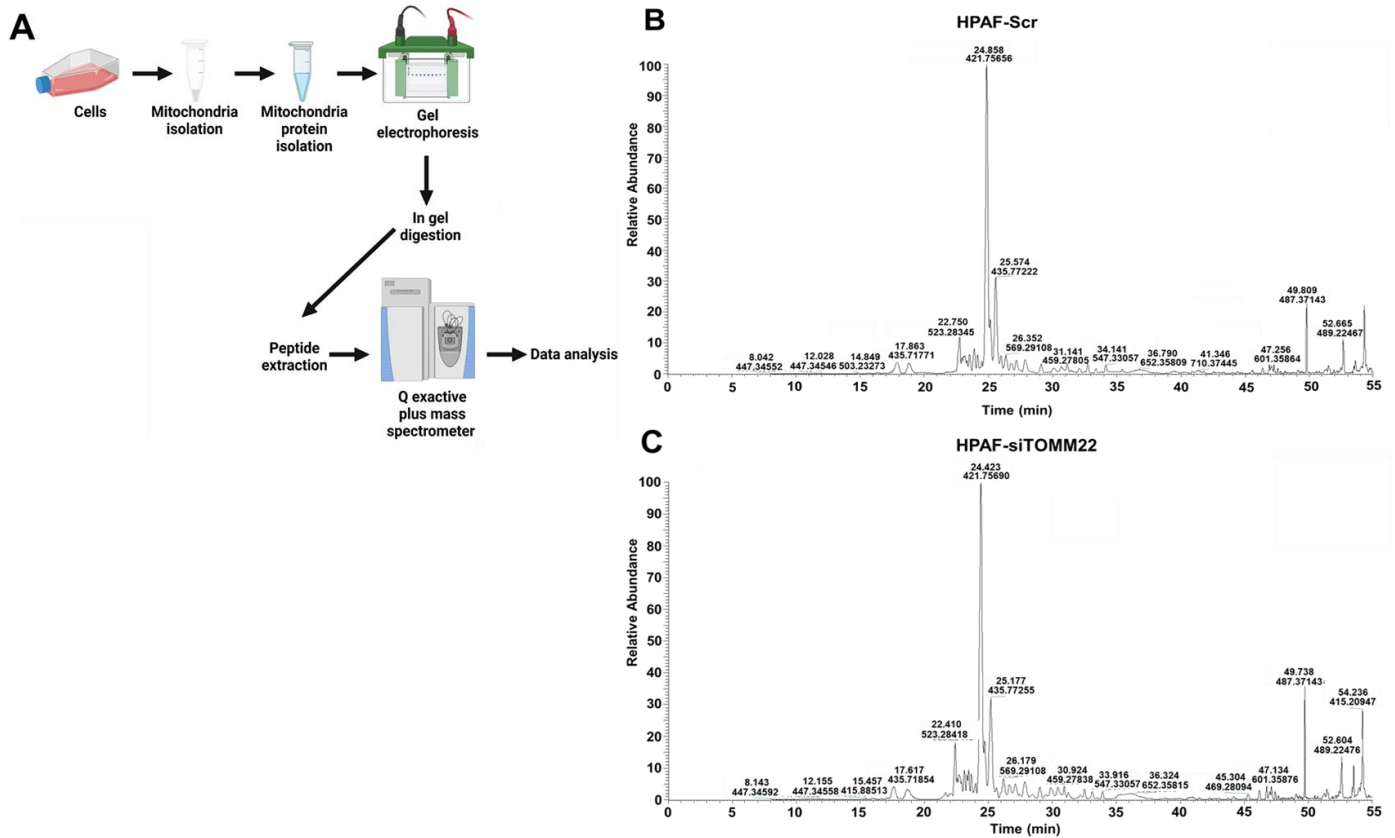

### Supplementary figure 5. Representative chromatograms from mass spectrometry runs of mitochondrial samples.

Workflow depicts steps undertaken to prepare mitochondrial samples for mass spectrometry analysis (**A**). Chromatograms (**B, C**) exhibiting relative abundance, were generated during mass spectrometry and analyzed using the Thermo Proteome Discoverer 2.2 software. Chromatograms are representative of three biological replicates. Scr: Scrambled control; siTOMM22: TOMM22 targeted siRNA pool (a set of 4 targets). Supplementary figure 5A was created with Biorender.com.
