# Supplementary material
Source: PubMed Central journal article supplement (PMC11673509)
Supplement: NIHMS1941916-supplement-6.pdf [file NIHMS1941916-supplement-6.pdf]

Supplementary figure 6

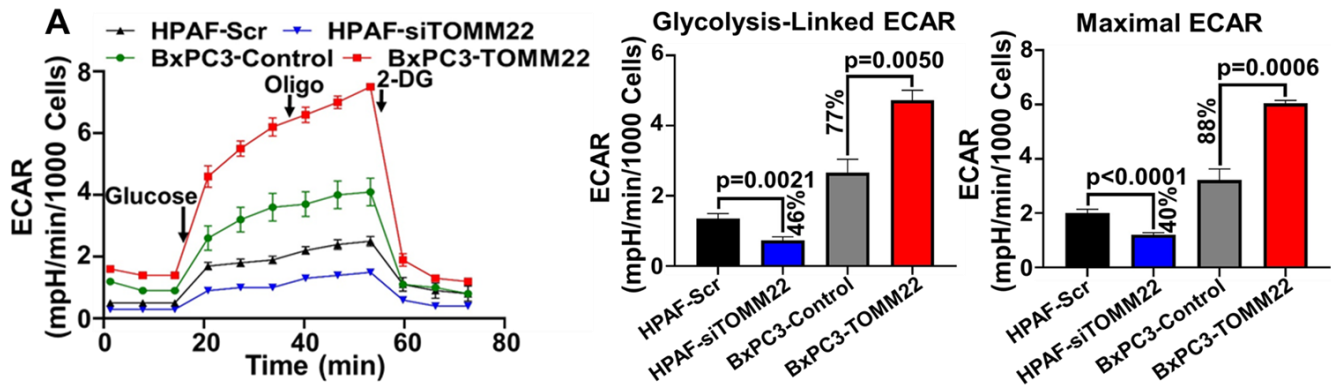

**Supplementary figure 6. TOMM22 overexpression is associated with a higher extracellular acidification rate of PDAC cells.**

ECAR of TOMM22 depleted cells [HPAF-siTOMM22] and TOMM22 overexpressing cells [BxPC3-TOMM22], relative to their respective controls (A). Data were normalized to relative cell numbers. Data represent mean  $\pm$  SEM, (n=3). Statistical analysis by unpaired Student's t-test.
