# Supplementary material
Source: PubMed Central journal article supplement (PMC11673509)
Supplement: NIHMS1941916-supplement-7.pdf [file NIHMS1941916-supplement-7.pdf]

## Supplementary figure 7

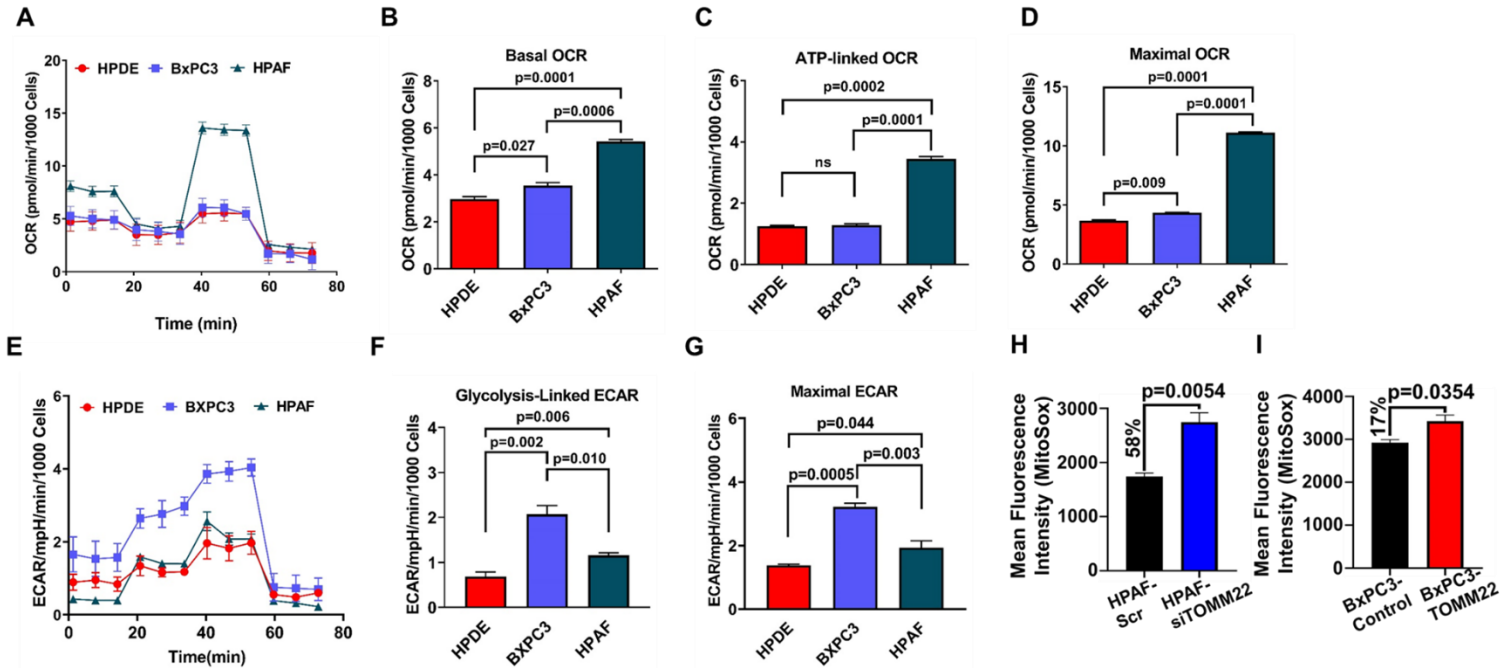

### Supplementary figure 7. Dependency of PDAC cells on energy production pathways.

OCR of non-cancerous (HPDE) and wild type PDAC cells (HPAF and BxPC3) (A-D) and their ECAR (E-G). Data were normalized to relative cell numbers. Data represents mean  $\pm$  SEM, (n=3). Statistical analysis by unpaired Student's t-test and one-way ANOVA. Mitochondrial ROS levels in TOMM22 silenced cells (H), TOMM22 overexpressing cells (I) and their control cells. Data represent mean  $\pm$  SEM, (n=3). Statistical analysis by unpaired Student's t-test.
