# Supplementary material
Source: PubMed Central journal article supplement (PMC11673509)
Supplement: NIHMS1941916-supplement-8.pdf [file NIHMS1941916-supplement-8.pdf]

**Supplementary table 1:** List of differentially expressed mitochondrial/mitochondrial associated proteins upon TOMM22 silencing in HPAF cells.

\*present in only control samples. #present in only knockdown samples

| <b>HPAF (Scr vs siTOMM22)</b> |                                                                                                                  |                    |
|-------------------------------|------------------------------------------------------------------------------------------------------------------|--------------------|
| <b>Gene symbol</b>            | <b>Protein name</b>                                                                                              | <b>Fold change</b> |
| HSPD1                         | 60 kDa heat shock protein, mitochondrial                                                                         | 1.5                |
| ENO1                          | Alpha-enolase                                                                                                    | 2.5                |
| ATP5F1A                       | ATP synthase subunit alpha, mitochondrial                                                                        | 2.4                |
| ATP5F1B                       | ATP synthase subunit beta, mitochondrial                                                                         | 2.8                |
| ALDH2                         | Aldehyde dehydrogenase, mitochondrial                                                                            | 4.0                |
| GAPDH                         | Glyceraldehyde-3-phosphate dehydrogenase                                                                         | 2.3                |
| MDH2                          | Malate dehydrogenase, mitochondrial                                                                              | 1.8                |
| TUFM                          | Elongation factor Tu, mitochondrial                                                                              | 2.0                |
| LDHB                          | L-lactate dehydrogenase B chain                                                                                  | 1.8                |
| SHMT2                         | Serine hydroxymethyltransferase, mitochondrial                                                                   | 2.3                |
| ACSL5                         | Long-chain-fatty-acid--CoA ligase 5                                                                              | 2.4                |
| PLIN3                         | Perilipin-3                                                                                                      | 7.0                |
| P4HB                          | Protein disulfide-isomerase                                                                                      | 1.7                |
| DLST                          | Dihydrolipoyllysine-residue succinyltransferase component of 2-oxoglutarate dehydrogenase complex, mitochondrial | 2.2                |
| ACADVL                        | Very long-chain specific acyl-CoA dehydrogenase, mitochondrial                                                   | 1.6                |
| VDAC1                         | Voltage-dependent anion-selective channel protein 1                                                              | 2.5                |
| SQOR                          | Sulfide:quinone oxidoreductase, mitochondrial                                                                    | 2.0                |
| LGALS3                        | Galectin-3                                                                                                       | 1.6                |
| PPIA                          | Peptidyl-prolyl cis-trans isomerase A                                                                            | -1.8               |
| SFXN1                         | Sideroflexin-1                                                                                                   | 1.6                |
| DLD                           | Dihydrolipoyl dehydrogenase, mitochondrial                                                                       | 1.8                |
| VDAC2                         | Voltage-dependent anion-selective channel protein 2                                                              | 1.8                |
| GLUD1                         | Glutamate dehydrogenase 1, mitochondrial                                                                         | 4.0                |
| PHB2                          | Prohibitin-2                                                                                                     | 1.8                |
| GSR                           | Glutathione reductase, mitochondrial                                                                             | 1.6                |
| UQCRC1                        | Cytochrome b-c1 complex subunit 1, mitochondrial                                                                 | 1.8                |
| NAMPT                         | Nicotinamide phosphoribosyltransferase                                                                           | 2.0                |
| HSPE1                         | 10 kDa heat shock protein, mitochondrial                                                                         | -1.7               |
| TUBB                          | Tubulin beta chain                                                                                               | 2.7                |
| HNRNPK                        | Heterogeneous nuclear ribonucleoprotein K                                                                        | 2.1                |
| HADHB                         | Trifunctional enzyme subunit beta, mitochondrial                                                                 | 4.0                |
| LRRC59                        | Leucine-rich repeat-containing protein 59                                                                        | 1.6                |
| H3C1                          | Histone H3.1                                                                                                     | 2.1                |
| FKBP4                         | Peptidyl-prolyl cis-trans isomerase FKBP4                                                                        | 2.0                |
| ATP5PO                        | ATP synthase subunit O, mitochondrial                                                                            | -1.5               |
| CYB5R3                        | NADH-cytochrome b5 reductase 3                                                                                   | 1.9                |
| G6PD                          | Glucose-6-phosphate 1-dehydrogenase                                                                              | 1.8                |
| HDAC2                         | Histone deacetylase 2                                                                                            | 2.0                |
| GOT2                          | Aspartate aminotransferase, mitochondrial                                                                        | 1.7                |

|           |                                                             |      |
|-----------|-------------------------------------------------------------|------|
| HRNR      | Hornerin                                                    | 4.0  |
| FH        | Fumarate hydratase, mitochondrial                           | 2.0  |
| ATP5F1C   | ATP synthase subunit gamma, mitochondrial                   | 4.0  |
| MAOB      | Amine oxidase [flavin-containing] B                         | 1.9  |
| FEN1      | Flap endonuclease 1                                         | 1.8  |
| UGP2      | UTP--glucose-1-phosphate uridylyltransferase                | 3.1  |
| CALR      | Calreticulin                                                | 1.9  |
| ETFA      | Electron transfer flavoprotein subunit alpha, mitochondrial | 3.25 |
| SORD      | Sorbitol dehydrogenase                                      | -1.8 |
| AKR1C4    | Aldo-keto reductase family 1 member C4                      | 6.7  |
| DDX28     | Probable ATP-dependent RNA helicase DDX28                   | 1.6  |
| ACAT1     | Acetyl-CoA acetyltransferase, mitochondrial                 | 2.3  |
| SAMM50    | Sorting and assembly machinery component 50 homolog         | *    |
| KRT8      | Keratin, type II cytoskeletal 8                             | 2.4  |
| KRT7      | Keratin, type II cytoskeletal 7                             | 2.3  |
| PLEC      | Plectin                                                     | -1.5 |
| KRT1      | Keratin, type II cytoskeletal 1                             | 4.1  |
| ANXA2     | Annexin A2                                                  | 1.9  |
| KRT18     | Keratin, type I cytoskeletal 18                             | 2.2  |
| KRT20     | Keratin, type I cytoskeletal 20                             | 2.0  |
| KRT2      | Keratin, type II cytoskeletal 2 epidermal                   | 3.4  |
| KRT9      | Keratin, type I cytoskeletal 9                              | 3.8  |
| TUBB4B    | Tubulin beta-4B chain                                       | 2.5  |
| KRT10     | Keratin, type I cytoskeletal 10                             | 3.6  |
| TUBA1A    | Tubulin alpha-1A chain                                      | 2.6  |
| ANXA1     | Annexin A1                                                  | 1.9  |
| KRT6A     | Keratin, type II cytoskeletal 6A                            | 4.9  |
| TUBB3     | Tubulin beta-3 chain                                        | 6.0  |
| TUBB2A    | Tubulin beta-2A chain                                       | 3.3  |
| EEF1G     | Elongation factor 1-gamma                                   | 2.3  |
| TUBA4A    | Tubulin alpha-4A chain                                      | 2.5  |
| KRT5      | Keratin, type II cytoskeletal 5                             | 4.0  |
| ANXA4     | Annexin A4                                                  | 1.7  |
| KRT14     | Keratin, type I cytoskeletal 14                             | 7.0  |
| PDIA3     | Protein disulfide-isomerase A3                              | 2.0  |
| RPL4      | 60S ribosomal protein L4                                    | 1.7  |
| LDHA      | L-lactate dehydrogenase A chain                             | 1.9  |
| EIF2S2    | Eukaryotic translation initiation factor 2 subunit 2        | 2.2  |
| H1-3      | Histone H1.3                                                | 3.5  |
| KRT16     | Keratin, type I cytoskeletal 16                             | 2.9  |
| MYH14     | Myosin-14                                                   | -1.5 |
| ALDH3A1   | Aldehyde dehydrogenase, dimeric NADP-preferring             | 5.5  |
| KRT15     | Keratin, type I cytoskeletal 15                             | 1.8  |
| CLIC1     | Chloride intracellular channel protein 1                    | 1.7  |
| ANXA3     | Annexin A3                                                  | 1.6  |
| HNRNPA2B1 | Heterogeneous nuclear ribonucleoproteins A2/B1              | 2.0  |
| RPS8      | 40S ribosomal protein S8                                    | -1.9 |

|          |                                                                               |      |
|----------|-------------------------------------------------------------------------------|------|
| DDOST    | Dolichyl-diphosphooligosaccharide--protein glycosyltransferase 48 kDa subunit | 1.9  |
| ASPH     | Aspartyl/asparaginyl beta-hydroxylase                                         | 3.2  |
| DHX9     | ATP-dependent RNA helicase A                                                  | -1.5 |
| HNRNPH1  | Heterogeneous nuclear ribonucleoprotein H                                     | 3.0  |
| RPL18    | 60S ribosomal protein L18                                                     | -5.4 |
| H1-5     | Histone H1.5                                                                  | 3.3  |
| PHGDH    | D-3-phosphoglycerate dehydrogenase                                            | 4.0  |
| HARS1    | Histidine--tRNA ligase, cytoplasmic                                           | 1.7  |
| ST13     | Hsc70-interacting protein                                                     | 2.0  |
| GDI2     | Rab GDP dissociation inhibitor beta                                           | 2.4  |
| HNRNPA1  | Heterogeneous nuclear ribonucleoprotein A1                                    | 2.2  |
| PDIA6    | Protein disulfide-isomerase A6                                                | 3.5  |
| YARS1    | Tyrosine--tRNA ligase, cytoplasmic                                            | 1.8  |
| RTN4     | Reticulon-4                                                                   | 2.4  |
| MDH1     | Malate dehydrogenase, cytoplasmic                                             | 1.9  |
| RPL15    | 60S ribosomal protein L15                                                     | -1.7 |
| PSMC1    | 26S proteasome regulatory subunit 4                                           | 1.6  |
| NT5E     | 5'-nucleotidase                                                               | 1.8  |
| H2BC12   | Histone H2B type 1-K                                                          | 1.8  |
| TMX1     | Thioredoxin-related transmembrane protein 1                                   | -1.5 |
| NAPRT    | Nicotinate phosphoribosyltransferase                                          | 2.2  |
| HNRNPD   | Heterogeneous nuclear ribonucleoprotein D0                                    | 1.6  |
| YWHAQ    | 14-3-3 protein theta                                                          | 1.6  |
| EIF3E    | Eukaryotic translation initiation factor 3 subunit E                          | 1.9  |
| FSCN1    | Fascin                                                                        | 1.9  |
| MYL6     | Myosin light polypeptide 6                                                    | -1.5 |
| H1-0     | Histone H1.0                                                                  | 2.5  |
| SLC16A3  | Monocarboxylate transporter 4                                                 | -2.2 |
| NPM1     | Nucleophosmin                                                                 | 2.5  |
| KRT23    | Keratin, type I cytoskeletal 23                                               | 2.9  |
| PSMC3    | 26S proteasome regulatory subunit 6A                                          | 2.0  |
| SEPTIN7  | Septin-7                                                                      | 2.1  |
| NME1     | Nucleoside diphosphate kinase A                                               | -1.8 |
| TXNRD1   | Thioredoxin reductase 1, cytoplasmic                                          | 3.4  |
| HNRNPL   | Heterogeneous nuclear ribonucleoprotein L                                     | 2.0  |
| FARSA    | Phenylalanine--tRNA ligase alpha subunit                                      | 1.5  |
| BCAP31   | B-cell receptor-associated protein 31                                         | -1.7 |
| PRDX6    | Peroxiredoxin-6                                                               | 2.0  |
| MAT2A    | S-adenosylmethionine synthase isoform type-2                                  | 1.8  |
| ARF4     | ADP-ribosylation factor 4                                                     | 1.6  |
| SERPINB6 | Serpin B6                                                                     | 1.7  |
| FKBP1A   | Peptidyl-prolyl cis-trans isomerase FKBP1A                                    | 2.0  |
| VAPA     | Vesicle-associated membrane protein-associated protein A                      | 3.8  |
| FDPS     | Farnesyl pyrophosphate synthase                                               | 1.5  |
| ARF6     | ADP-ribosylation factor 6                                                     | 1.7  |
| RPL9     | 60S ribosomal protein L9                                                      | -1.6 |
| CSTB     | Cystatin-B                                                                    | -2.0 |
| ANXA5    | Annexin A5                                                                    | 9.5  |

|           |                                                                                   |      |
|-----------|-----------------------------------------------------------------------------------|------|
| SPTLC1    | Serine palmitoyltransferase 1                                                     | 3.9  |
| EIF3F     | Eukaryotic translation initiation factor 3 subunit F                              | -1.4 |
| RPS12     | 40S ribosomal protein S12                                                         | -2.4 |
| APEX1     | DNA-(apurinic or apyrimidinic site) endonuclease                                  | 1.5  |
| LYZ       | Lysozyme C                                                                        | 3.5  |
| RPS5      | 40S ribosomal protein S5                                                          | -1.6 |
| NARS1     | Asparagine--tRNA ligase, cytoplasmic                                              | 1.6  |
| STAT1     | Signal transducer and activator of transcription 1-alpha/beta                     | #    |
| ETF1      | Eukaryotic peptide chain release factor subunit 1                                 | 1.6  |
| EIF3B     | Eukaryotic translation initiation factor 3 subunit B                              | -1.9 |
| CAMK2B    | Calcium/calmodulin-dependent protein kinase type II subunit beta                  | 3.2  |
| MACROH2A1 | Core histone macro-H2A.1                                                          | 1.9  |
| CYP2S1    | Cytochrome P450 2S1                                                               | 1.8  |
| PPP2R2A   | Serine/threonine-protein phosphatase 2A 55 kDa regulatory subunit B alpha isoform | 2.2  |
| SERPINH1  | Serpin H1                                                                         | -1.8 |
| CANX      | Calnexin                                                                          | 1.7  |
| RPS16     | 40S ribosomal protein S16                                                         | -1.5 |
| RPL21     | 60S ribosomal protein L21                                                         | #    |
